# Supplementary figures and images for: Is the use of two versus one long-acting bronchodilator by patients with COPD associated with a higher risk of acute coronary syndrome in real-world clinical practice?
Source: HighWire-hosted journal article supplement (doi:10.1136/bmjresp-2020-000840), 2021-01-01

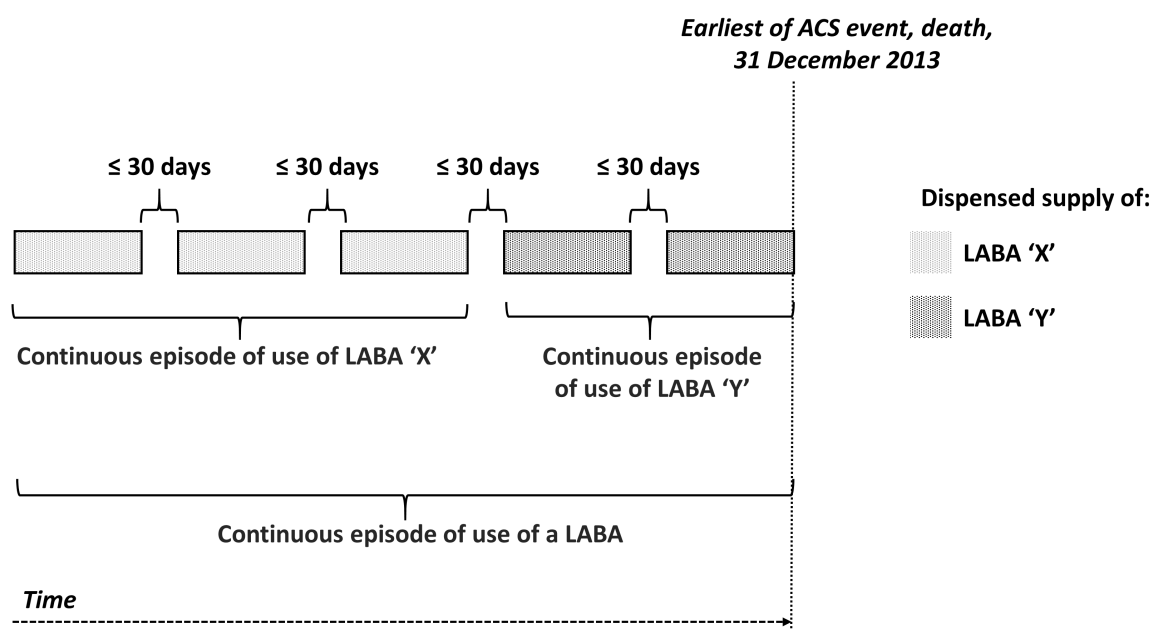

Supplement: bmjresp-2020-000840supp001_data_supplement.pdf [file bmjresp-2020-000840supp001_data_supplement.pdf]

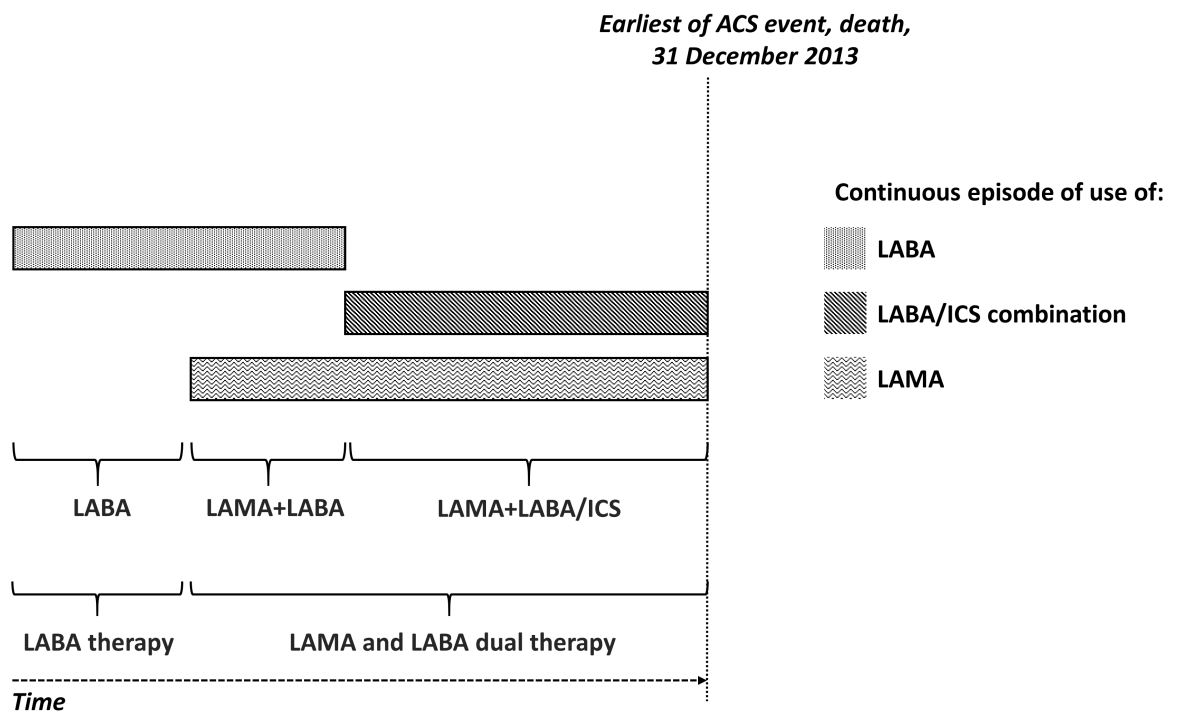

Supplement: bmjresp-2020-000840supp002_data_supplement.pdf [file bmjresp-2020-000840supp002_data_supplement.pdf]

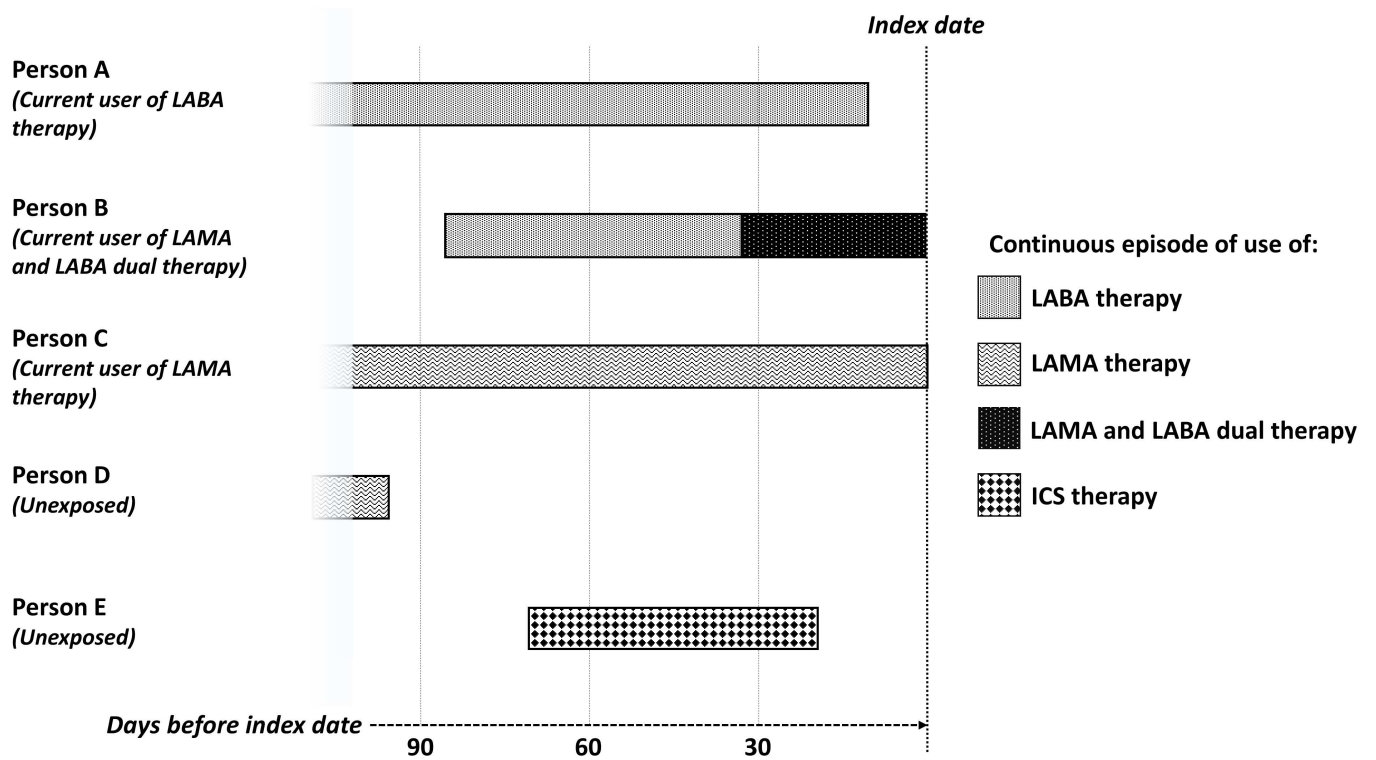

Supplement: bmjresp-2020-000840supp003_data_supplement.pdf [file bmjresp-2020-000840supp003_data_supplement.pdf]
